# Supplementary material
Source: Research Square preprint supplement (doi:10.21203/rs.3.rs-8683676/v1)
Supplement: Supplementary file 1 [file 8b6f5f9105153c8de3767df1.docx]

**Standardization of a protocol for osteoarthritis induction in rats using single-dose monosodium iodoacetate: clinical, radiographic, and histological evaluation for a preclinical study**

Graphical Abstract
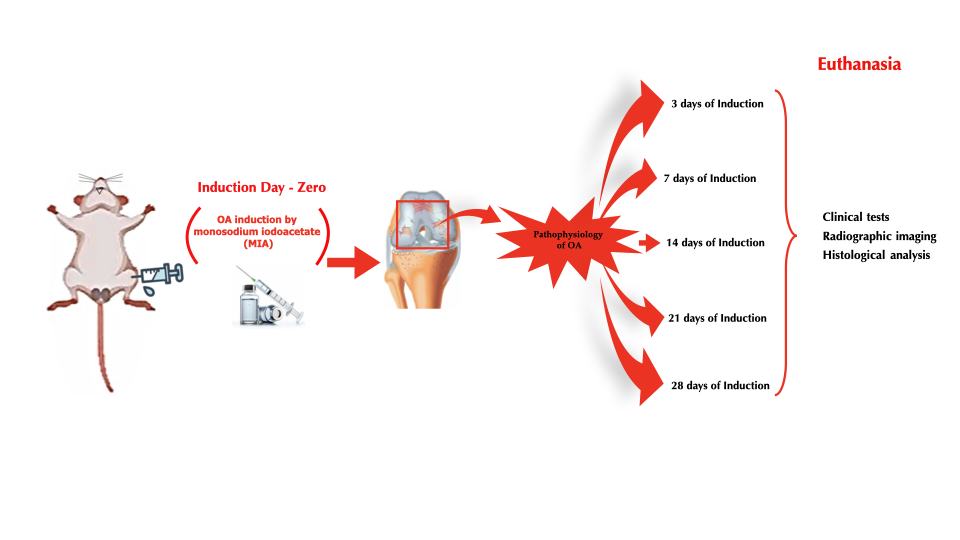


Highlights

Authors

Luis Ângelo Macêdo Santiago, Laércio Santos DiasandEduardo Martins de Sousa

Correspondence**:** [luis.angelo@ufma.br](mailto:luis.angelo@ufma.br)

In Brief

Was investigated and we analyzed all stages of the pathophysiological progression, with the aim of providing more accurate data for better reproducibility for experimental studies related to the pathology.

- The method of inducing OA in experimental animal studies reproduces similar effects in humans.
- Administered to the knees of animals, it produces degenerative effects on the cartilage.
- Monitoring and observing the progression and evolution of joint damage throughout the course of the pathology.
- Aassociating the changes through clinical tests with radiological and histological images.
- The study demonstrated with precision all the stages of the pathophysiological process of the OA induction method.
